# Supplementary material for: Molecular Epidemiology of SARS-CoV-2 during Five COVID-19 Waves and the Significance of Low-Frequency Lineages
Source: Viruses. 2023 May 18;15(5):1194. doi: 10.3390/v15051194 (PMC10223853; doi:10.3390/v15051194)
Supplement: Supplementary file 1 [file viruses-15-01194-s001.zip › Supplementary tables S1 to S4.pdf]

## Supplementary data

**Table S1. Demographic data for B.1 and B.1.1 lineages from 2020 to 2022**

| Patient status                   | B.1 (N=17)  |             |             |              |              |             | Unknown (N=1) | B.1.1 (N=47) |             |              |               |              |             | Unknown (N=1) |
|----------------------------------|-------------|-------------|-------------|--------------|--------------|-------------|---------------|--------------|-------------|--------------|---------------|--------------|-------------|---------------|
|                                  | <5 (N=0)    | 5-14 (N=1)  | 15-24 (N=0) | 25-44 (N=5)  | 45-60 (N=7)  | >60 (N=3)   |               | <5 (N=0)     | 5-14 (N=0)  | 15-24 (N=6)  | 25-44 (N=28)  | 45-60 (N=7)  | >60 (N=3)   |               |
| <b>Community screen and test</b> |             | 1/1 (100%)  |             | 5/5 (100%)   | 3/7 (57.1%)  | 2/3 (66.7%) |               |              |             | 2/6 (33.3%)  | 14/28 (50.0%) | 5/9 (55.6%)  | 2/3 (66.7%) |               |
| <b>In-patient</b>                |             |             |             |              | 2/7 (28.6%)  |             |               |              |             | 2/6 (33.3%)  | 2/28 (7.1%)   | 1/9 (11.1%)  |             |               |
| Cardiac unit                     |             |             |             |              |              |             |               |              |             | 1/6 (16.7%)  | 1/28 (3.6%)   |              |             |               |
| Neurology                        |             |             |             |              | 1/7 (14.3%)  |             |               |              |             |              |               |              |             |               |
| Other                            |             |             |             |              | 1/7 (14.3%)  |             |               |              |             | 1/6 (16.7%)  | 1/28 (3.6%)   | 1/9 (11.1%)  |             |               |
| <b>Out-patient</b>               |             |             |             |              | 1/7 (14.3%)  |             |               |              |             | 1/6 (16.7%)  | 12/28 (42.9%) | 3/9 (33.3%)  | 1/3 (33.3%) | 1/1 (100%)    |
| ARV clinic                       |             |             |             |              |              |             |               |              |             |              | 1/28 (3.6%)   | 1/9 (11.1%)  |             |               |
| Healthcare worker                |             |             |             |              |              |             |               |              |             | 1/6 (16.7%)  | 2/28 (7.1%)   |              | 1/3 (33.3%) |               |
| Paediatric                       |             |             |             |              |              |             |               |              |             |              | 1/28 (3.6%)   |              |             |               |
| Casualty                         |             |             |             |              | 1/7 (14.3%)  |             |               |              |             |              | 8/28 (28.6%)  | 2/9 (22.2%)  |             |               |
| <b>Unknown</b>                   |             |             |             |              |              | 1/3 (33.3%) | 1/1 (100%)    |              |             |              |               |              |             |               |
| <b>Total</b>                     | 0/17 (0.0%) | 1/17 (5.9%) | 0/17 (0.0%) | 5/17 (29.4%) | 7/17 (41.2%) | 3/17 (6.4%) | 0/17 (0.0%)   | 0/47 (0.0%)  | 0/47 (0.0%) | 6/47 (12.8%) | 28/47 (59.6%) | 9/47 (19.2%) | 3/47 (6.4%) | 1/47 (2.1%)   |

**Table S2. Demographic data for B.1.1.438 and B.1.1.52 lineages from 2020 to 2022**

| Patient status            | B.1.1.348 (N=8)       |                       |                        |                        |                        |                        |                        | B.1.1.52 (N=13)        |                        |                        |                         |                         |                        |                        |
|---------------------------|-----------------------|-----------------------|------------------------|------------------------|------------------------|------------------------|------------------------|------------------------|------------------------|------------------------|-------------------------|-------------------------|------------------------|------------------------|
|                           | <5<br>(N=0)           | 5-14<br>(N=0)         | 15-24<br>(N=1)         | 25-44<br>(N=3)         | 45-60<br>(N=2)         | >60<br>(N=1)           | Unknown<br>(N=1)       | <5<br>(N=1)            | 5-14<br>(N=1)          | 15-24<br>(N=0)         | 25-44<br>(N=7)          | 45-60<br>(N=3)          | >60<br>(N=0)           | Unknown<br>(N=1)       |
| Community screen and test |                       |                       | 1/1<br>(100%)          | 3/3<br>(100%)          | 1/2<br>(50.0%)         |                        | 1/1<br>(100%)          | 1/1<br>(100%)          | 1/1<br>(100%)          |                        | 2/7<br>(28.6%)          | 2/3<br>(66.7%)          |                        |                        |
| In-patient                |                       |                       |                        |                        |                        |                        |                        |                        |                        |                        | 1/7<br>(14.3%)          |                         |                        |                        |
| ICU                       |                       |                       |                        |                        |                        |                        |                        |                        |                        |                        | 1/7<br>(14.3%)          |                         |                        |                        |
| Out-patient               |                       |                       |                        |                        | 1/2<br>(50.0%)         |                        |                        |                        |                        |                        | 4/7<br>(57.1%)          | 1/3<br>(33.3%)          |                        | 1/1<br>(100%)          |
| ARV clinic                |                       |                       |                        |                        |                        | 1/1<br>(100%)          |                        |                        |                        |                        | 2/7<br>(28.6%)          |                         |                        |                        |
| Healthcare worker         |                       |                       |                        |                        | 1/2<br>(50.0%)         | 1/1<br>(100%)          |                        |                        |                        |                        |                         | 1/3<br>(33.3%)          |                        | 1/1<br>(100%)          |
| Casualty                  |                       |                       |                        |                        |                        |                        |                        |                        |                        |                        | 2/7<br>(28.6%)          |                         |                        |                        |
| <b>Total</b>              | <b>0/8<br/>(0.0%)</b> | <b>0/8<br/>(0.0%)</b> | <b>1/8<br/>(12.5%)</b> | <b>3/8<br/>(37.5%)</b> | <b>2/8<br/>(25.0%)</b> | <b>1/8<br/>(12.5%)</b> | <b>1/8<br/>(12.5%)</b> | <b>1/13<br/>(7.7%)</b> | <b>1/13<br/>(7.7%)</b> | <b>0/13<br/>(0.0%)</b> | <b>7/13<br/>(53.8%)</b> | <b>3/13<br/>(23.1%)</b> | <b>0/13<br/>(0.0%)</b> | <b>1/13<br/>(7.7%)</b> |

**Table S3. Demographic data for C.1 and C.1.2 lineages from 2020 to 2022**

| Patient status                   | C.1 (N=38)         |                    |                    |                      |                     |                    |                      | C.1.2 (N=53)      |                    |                     |                      |                      |                    |                      |
|----------------------------------|--------------------|--------------------|--------------------|----------------------|---------------------|--------------------|----------------------|-------------------|--------------------|---------------------|----------------------|----------------------|--------------------|----------------------|
|                                  | <5<br>(N=0<br>)    | 5-14<br>(N=1<br>)  | 15-24<br>(N=3<br>) | 25-44<br>(N=22<br>)  | 45-60<br>(N=7<br>)  | >60<br>(N=3<br>)   | Unknown<br>(N=1<br>) | <5<br>(N=0<br>)   | 5-14<br>(N=1<br>)  | 15-24<br>(N=8<br>)  | 25-44<br>(N=29<br>)  | 45-60<br>(N=10<br>)  | >60<br>(N=5<br>)   | Unknown<br>(N=0<br>) |
| <b>Community screen and test</b> |                    | 1/1<br>(100%<br>)  | 3/3<br>(100%<br>)  | 11/22<br>(50.0%<br>) | 1/7<br>(14.2%<br>)  |                    |                      |                   |                    | 8/8<br>(100%<br>)   | 24/29<br>(82.8%<br>) | 10/10<br>(100%<br>)  | 4/5<br>(80.0%<br>) |                      |
| <b>In-patient</b>                |                    |                    |                    | 2/22<br>(9.1%<br>)   | 2/7<br>(28.6%<br>)  | 1/3<br>(33.3%<br>) |                      |                   | 1/1<br>(100%<br>)  |                     | 1/29<br>(3.5%<br>)   |                      |                    |                      |
| Chronic dialysis                 |                    |                    |                    |                      | 1/7<br>(14.3%<br>)  |                    |                      |                   |                    |                     |                      |                      |                    |                      |
| Other                            |                    |                    |                    | 2/22<br>(9.1%<br>)   | 1/7<br>(14.3%<br>)  | 1/3<br>(33.3%<br>) |                      |                   | 1/1<br>(100%<br>)  |                     | 1/29<br>(3.5%<br>)   |                      |                    |                      |
| <b>Out-patient</b>               |                    |                    |                    | 9/22<br>(40.9%<br>)  | 4/7<br>(57.1%<br>)  | 2/3<br>(66.7%<br>) |                      |                   |                    |                     | 4/29<br>(13.8%<br>)  |                      | 1/5<br>(20.0%<br>) |                      |
| ARV clinic                       |                    |                    |                    | 2/22<br>(9.1%<br>)   |                     |                    |                      |                   |                    |                     |                      |                      |                    |                      |
| Healthcare worker                |                    |                    |                    | 2/22<br>(9.1%<br>)   |                     |                    |                      |                   |                    |                     | 1/29<br>(3.5%<br>)   |                      |                    |                      |
| Casualty                         |                    |                    |                    | 5/22<br>(22.7%<br>)  | 4/7<br>(57.1%<br>)  | 2/3<br>(66.7%<br>) |                      |                   |                    |                     | 3/29<br>(10.3%<br>)  |                      | 1/5<br>(20.0%<br>) |                      |
| <b>Unknown</b>                   |                    |                    |                    |                      |                     |                    | 1/1<br>(100%<br>)    |                   |                    |                     |                      |                      |                    |                      |
| <b>Total</b>                     | 0/38<br>(0.0%<br>) | 1/38<br>(2.6%<br>) | 3/38<br>(7.9%<br>) | 22/38<br>(57.9%<br>) | 7/38<br>(18.4%<br>) | 3/38<br>(7.9%<br>) | 1/38<br>(2.6%<br>)   | 0/6<br>(0.0%<br>) | 1/6<br>(16.7%<br>) | 8/53<br>(15.1%<br>) | 29/53<br>(54.7%<br>) | 10/53<br>(18.9%<br>) | 5/53<br>(9.4%<br>) | 0/53<br>(0.0%<br>)   |

**Table S4. Demographic data for C.2 lineages from 2020 to 2022**

| Patient status            | C.2 (N=6)  |             |             |             |             |             |               |
|---------------------------|------------|-------------|-------------|-------------|-------------|-------------|---------------|
|                           | <5 (N=0)   | 15-24 (N=1) | 15-24 (N=0) | 25-44 (N=3) | 45-60 (N=1) | >60 (N=1)   | Unknown (N=0) |
| Community screen and test |            | 1/1 (100%)  |             | 1/3 (33.3%) |             |             |               |
| In-patient                |            |             |             | 1/3 (33.3%) | 1/1 (100%)  |             |               |
| Oncology                  |            |             |             |             | 1/1 (100%)  |             |               |
| Rheumatology/nephrology   |            |             |             | 1/3 (33.3%) |             |             |               |
| Out-patient               |            |             |             | 1/3 (33.3%) |             | 1/1 (100%)  |               |
| Casualty                  |            |             |             | 1/3 (33.3%) |             | 1/1 (100%)  |               |
| Total                     | 0/6 (0.0%) | 1/6 (16.7%) | 0/6 (0.0%)  | 3/6 (50.0%) | 1/6 (16.7%) | 1/6 (16.7%) | 0/6 (0.0%)    |
