# Supplementary material for: Molecular Epidemiology of SARS-CoV-2 during Five COVID-19 Waves and the Significance of Low-Frequency Lineages
Source: Viruses. 2023 May 18;15(5):1194. doi: 10.3390/v15051194 (PMC10223853; doi:10.3390/v15051194)
Supplement: Supplementary file 1 [file viruses-15-01194-s001.zip › Supplementary tables S5 to S11.pdf]

[illegible]

**Table S6. Mutations detected across the whole genome of B.1.1 lineage from 2020 to 2022**

[illegible]

**Table S7. Mutations detected across the whole genome of B.1.1.348 lineage in 2020**

\*envelope (E), membrane (M), nucleocapsid (N), non-structural protein (nsp), papain-like protease (PLpro), RNA-dependent RNA-polymerase RdRp, spike (S)

**Table S8. Mutations detected across the whole genome of B.1.1.52 lineage from 2020**

| Genes            | 3CLpro |     | M   |     | N   |     | nsp1 | nsp2 | nsp5 | nsp6 | nsp8 | nsp14 | orf3a |     | Plpro |      | RdRp |     | S   |
|------------------|--------|-----|-----|-----|-----|-----|------|------|------|------|------|-------|-------|-----|-------|------|------|-----|-----|
| Positions        | 142    | 196 | 210 | 212 | 203 | 204 | 84   | 424  | 218  | 220  | 138  | 349   | 23    | 255 | 666   | 1639 | 257  | 323 | 614 |
| Wuhan Hu-1       | N      | T   | H   | S   | R   | G   | V    | G    | S    | F    | Y    | K     | A     | V   | T     | T    | V    | P   | D   |
| April 2020 (N=5) |        | M   | R   | R   | K   | R   |      | C    | F    |      | H    |       | S     | del | S     | A    |      | L   | G   |
| May 2020 (N=4)   | S      |     | R   | R   | K   | R   |      | C    |      | V    | H    |       |       |     |       | A    | F    | L   | G   |
| June 2020 (N=4)  |        |     | R   | R   | K   | R   | I    |      |      |      | H    | N     |       | del |       | A    |      | L   | G   |

\*3C-like protease (3CLpro), membrane (M), nucleocapsid (N), non-structural protein (nsp), open-reading frame (ORF), papain-like protease (PLpro), RNA-dependent RNA-polymerase RdRp, spike (S)

**Table S9. Mutations detected across the whole genome of C.1 lineage from 2020 to 2021**

| Genes                | 3CLpro |    | M |     | N  |    |     |     |     |     |     |     | nsp1 |     | nsp2 |     | nsp4 |     |    | nsp6 |     | nsp8 |    |     | nsp13 |     |     | nsp14 |     |     | ORF3a |     |     |     | ORF8 |      | PLpro |    |   | RdRp |  | S |  |
|----------------------|--------|----|---|-----|----|----|-----|-----|-----|-----|-----|-----|------|-----|------|-----|------|-----|----|------|-----|------|----|-----|-------|-----|-----|-------|-----|-----|-------|-----|-----|-----|------|------|-------|----|---|------|--|---|--|
| Positions            | 15     | 38 | 8 | 68  | 34 | 70 | 141 | 203 | 204 | 272 | 382 | 384 | 49   | 156 | 200  | 218 | 438  | 457 | 37 | 29   | 138 | 178  | 18 | 392 | 403   | 305 | 516 | 202   | 240 | 254 | 255   | 24  | 62  | 428 | 945  | 1639 | 323   | 98 |   |      |  |   |  |
| Wuhan Hu1            | G      | C  | I | A   | G  | Q  | T   | R   | G   | Q   | L   | Q   | G    | D   | P    | S   | L    | A   | L  | G    | Y   | P    | A  | R   | A     | A   | I   | T     | V   | P   | G     | V   | S   | V   | T    | K    | T     | P  | S |      |  |   |  |
| April 2020 (N=4)     | S      |    |   | del |    |    |     |     | K   | R   |     | S   | H    |     | N    | F   |      |     |    |      |     | H    |    |     |       |     |     |       |     |     |       | del |     | I   |      | A    | L     |    |   |      |  |   |  |
| May 2020 (N=7)       | S      | G  |   |     |    |    | I   | K   | R   |     |     |     | H    | C   | N    | S   |      |     |    |      |     |      |    |     |       |     |     |       |     |     |       | del |     | I   |      | A    | L     |    |   |      |  |   |  |
| June 2020 (N=4)      | S      |    |   | V   |    |    |     | K   | R   |     | R   |     | H    |     |      |     |      |     |    |      |     |      |    | C   |       |     |     |       |     |     |       | del |     | I   |      |      | L     |    |   |      |  |   |  |
| July 2020 (N=4)      | S      |    |   |     | W  |    |     | K   | R   |     |     |     | H    |     |      |     |      |     |    | F    |     |      | S  |     |       |     |     |       |     |     |       | del |     | I   |      |      | L     |    |   |      |  |   |  |
| August 2020 (N=12)   | S      |    |   |     |    | R  |     | K   | R   |     |     |     | H    |     |      |     | F    | T   |    | F    |     | S    |    |     | T     |     |     |       |     |     |       | del |     | I   | R    |      | L     |    |   |      |  |   |  |
| September 2020 (N=5) | S      |    |   |     |    | R  |     | K   | R   |     |     |     | H    |     |      |     |      |     |    |      |     |      |    |     |       |     |     |       | del | S   |       |     | del |     | I    | R    |       | L  | F |      |  |   |  |
| October 2020 (N=1)   |        |    |   |     |    |    |     | K   | R   |     |     |     |      |     |      |     |      |     |    |      |     |      |    |     |       |     |     |       |     |     |       |     | del |     | I    |      | A     | L  |   |      |  |   |  |
| July 2021 (N=1)      | S      |    |   |     |    |    |     | K   | R   |     |     |     | H    |     |      |     |      |     |    |      |     |      |    |     |       |     |     |       |     |     |       |     | del |     | I    |      |       | L  |   |      |  |   |  |

\*3C-like protease (3CLpro), membrane (M), nucleocapsid (N), non-structural protein (nsp), open-reading frame (ORF), papain-like protease (PLpro), RNA-dependent RNA-polymerase RdRp, spike (S)

**Table S10. Mutations detected across the whole genome of C.1.2 lineage from 2020 to 2021**

| Genes                 | 3CLpro |    |    |     | E  |    | M  |    | N  |    |     |     |     |     |     |     | nsp1 |     |     |     | nsp2 |     |     |     | nsp4 |     |    |     | nsp6 |     |    |     | nsp10 | nsp14 | nsp15 | nsp16 | ORF3a |     |    |    |    |    |    |     |     |     |     |     |     |     |     |  |  |  |  |
|-----------------------|--------|----|----|-----|----|----|----|----|----|----|-----|-----|-----|-----|-----|-----|------|-----|-----|-----|------|-----|-----|-----|------|-----|----|-----|------|-----|----|-----|-------|-------|-------|-------|-------|-----|----|----|----|----|----|-----|-----|-----|-----|-----|-----|-----|-----|--|--|--|--|
| Positions             | 15     | 24 | 90 | 108 | 21 | 68 | 29 | 82 | 13 | 80 | 186 | 203 | 204 | 383 | 384 | 85  | 87   | 102 | 110 | 141 | 142  | 143 | 166 | 157 | 181  | 429 | 33 | 233 | 289  | 438 | 37 | 106 | 107   | 108   | 111   | 68    | 33    | 160 | 18 | 33 | 34 | 67 | 95 | 155 | 181 | 216 | 223 | 229 | 238 | 255 | 275 |  |  |  |  |
| Wuhan Hu-1            | G      | T  | K  | P   | L  | S  | L  | I  | P  | P  | S   | R   | G   | P   | Q   | M   | E    | E   | H   | K   | S    | F   | S   | V   | P    | T   | M  | V   | I    | L   | L  | S   | G     | F     | T     | G     | T     | K   | G  | A  | T  | K  | L  | D   | E   | S   | T   | T   | D   | V   | L   |  |  |  |  |
| June 2021 (N=7)       | S      | I  |    |     | I  | F  | F  | T  | L  |    | P   | K   | R   |     | H   |     |      | K   |     |     |      |     |     |     |      |     |    |     |      |     |    |     |       |       |       |       |       |     |    |    |    |    |    |     |     |     |     |     |     |     |     |  |  |  |  |
| July 2021 (N=10)      | S      | I  |    |     | I  | P  | F  | T  | L  | R  |     | K   | R   |     | L   | del |      | K   |     | del | del  | del |     |     |      |     |    |     |      |     |    |     |       |       |       |       |       |     |    |    |    |    |    |     |     |     |     |     |     |     |     |  |  |  |  |
| August 2021 (N=16)    | S      | I  |    | S   | I  | P  | F  | T  | L  | R  |     | K   | R   |     | L   |     |      | K   |     |     |      |     |     |     |      |     |    |     |      |     |    |     |       |       |       |       |       |     |    |    |    |    |    |     |     |     |     |     |     |     |     |  |  |  |  |
| September 2021 (N=11) | S      | I  |    |     | I  | P  | F  | T  | L  | R  | P   | K   | R   |     | L   |     |      | K   | L   |     |      |     | G   |     |      |     |    |     |      |     |    |     |       |       |       |       |       |     |    |    |    |    |    |     |     |     |     |     |     |     |     |  |  |  |  |
| October 2021 (N=4)    | S      |    | R  |     | I  | F  | F  | T  | L  | R  |     | K   | R   |     | L   |     |      | K   |     |     |      |     |     |     |      |     |    |     |      |     |    |     |       |       |       |       |       |     |    |    |    |    |    |     |     |     |     |     |     |     |     |  |  |  |  |
| November 2021 (N=1)   | S      |    |    |     |    | F  |    |    | T  | L  |     | K   | R   |     | H   |     |      | K   |     |     |      |     |     |     |      |     |    |     |      |     |    |     |       |       |       |       |       |     |    |    |    |    |    |     |     |     |     |     |     |     |     |  |  |  |  |
| December 2021 (N=2)   | S      | I  |    |     | I  | F  | T  |    | L  |    | K   | R   |     | H   |     |     |      | K   |     |     |      |     |     |     |      |     |    |     |      |     |    |     |       |       |       |       |       |     |    |    |    |    |    |     |     |     |     |     |     |     |     |  |  |  |  |

  

| Genes                 | ORF7a |    | ORF7b |    | ORF8 |     |    |     | Plpro |     |     |     |     |     |     |      | RdRp |     |     |     | S   |     |   |    |    |    |    |     |     |     |     |     |     |     |     |     |     |     |     |     |     |     |     |     |     |     |     |     |     |     |     |     |      |  |  |  |  |
|-----------------------|-------|----|-------|----|------|-----|----|-----|-------|-----|-----|-----|-----|-----|-----|------|------|-----|-----|-----|-----|-----|---|----|----|----|----|-----|-----|-----|-----|-----|-----|-----|-----|-----|-----|-----|-----|-----|-----|-----|-----|-----|-----|-----|-----|-----|-----|-----|-----|-----|------|--|--|--|--|
| Positions             | 43    | 40 | 7     | 16 | 120  | 121 | 93 | 126 | 153   | 237 | 385 | 428 | 819 | 822 | 864 | 1274 | 1693 | 140 | 184 | 323 | 337 | 744 | 9 | 25 | 26 | 67 | 75 | 105 | 136 | 143 | 144 | 152 | 190 | 215 | 241 | 242 | 243 | 244 | 440 | 449 | 477 | 478 | 484 | 501 | 585 | 614 | 655 | 679 | 681 | 716 | 859 | 879 | 1101 |  |  |  |  |
| Wuhan Hu-1            | N     | T  | L     | F  | F    | I   | S  | S   | P     | T   | I   | T   | T   | P   | T   | H    | K    | D   | Q   | P   | G   | E   | P | P  | P  | A  | G  | I   | C   | V   | Y   | W   | R   | D   | L   | L   | A   | L   | N   | Y   | S   | T   | E   | N   | L   | D   | H   | N   | P   | T   | T   | A   | H    |  |  |  |  |
| June 2021 (N=7)       |       |    |       |    |      |     |    |     |       |     |     |     |     |     |     |      |      |     |     |     |     |     |   |    |    |    |    |     |     |     |     |     |     |     |     |     |     |     |     |     |     |     |     |     |     |     |     |     |     |     |     |     |      |  |  |  |  |
| July 2021 (N=10)      |       |    |       |    |      |     |    |     |       |     |     |     |     |     |     |      |      |     |     |     |     |     |   |    |    |    |    |     |     |     |     |     |     |     |     |     |     |     |     |     |     |     |     |     |     |     |     |     |     |     |     |     |      |  |  |  |  |
| August 2021 (N=16)    | K     |    |       |    |      |     |    |     |       |     |     |     |     |     |     |      |      |     |     |     |     |     |   |    |    |    |    |     |     |     |     |     |     |     |     |     |     |     |     |     |     |     |     |     |     |     |     |     |     |     |     |     |      |  |  |  |  |
| September 2021 (N=11) |       |    |       |    |      |     |    |     |       |     |     |     |     |     |     |      |      |     |     |     |     |     |   |    |    |    |    |     |     |     |     |     |     |     |     |     |     |     |     |     |     |     |     |     |     |     |     |     |     |     |     |     |      |  |  |  |  |
| October 2021 (N=4)    |       |    |       |    |      |     |    |     |       |     |     |     |     |     |     |      |      |     |     |     |     |     |   |    |    |    |    |     |     |     |     |     |     |     |     |     |     |     |     |     |     |     |     |     |     |     |     |     |     |     |     |     |      |  |  |  |  |
| November 2021 (N=1)   |       |    |       |    |      |     |    |     |       |     |     |     |     |     |     |      |      |     |     |     |     |     |   |    |    |    |    |     |     |     |     |     |     |     |     |     |     |     |     |     |     |     |     |     |     |     |     |     |     |     |     |     |      |  |  |  |  |
| December 2021 (N=2)   |       |    |       |    |      |     |    |     |       |     |     |     |     |     |     |      |      |     |     |     |     |     |   |    |    |    |    |     |     |     |     |     |     |     |     |     |     |     |     |     |     |     |     |     |     |     |     |     |     |     |     |     |      |  |  |  |  |

\*3C-like protease (3CLpro), envelope (E), membrane (M), nucleocapsid (N), non-structural protein (nsp), open-reading frame (ORF), papain-like protease (PLpro), RNA-dependent RNA-polymerase RdRp, spike (S)

**Table S11. Mutations detected across the whole genome of C.2 lineage from 2020**

| Genes                | 3CLpro | N   |     | nsp2 | nsp4 | nsp6 | nsp14 | nsp15 | nsp16 | ORF3a | ORF7a | PLpro | Rdrp |     | S   |     |     |      |
|----------------------|--------|-----|-----|------|------|------|-------|-------|-------|-------|-------|-------|------|-----|-----|-----|-----|------|
| Positions            | 15     | 203 | 204 | 274  | 264  | 37   | 85    | 44    | 182   | 23    | 63    | 428   | 302  | 323 | 614 | 623 | 679 | 1219 |
| Wuhan Hu-1           | G      | R   | G   | L    | L    | L    | A     | E     | K     | A     | F     | T     | L    | P   | D   | A   | N   | G    |
| July 2020 (N=1)      | S      | K   | R   |      | I    |      | S     |       |       |       |       | I     | S    | L   | G   |     |     | V    |
| August 2020 (N=2)    | S      | K   | R   | F    |      |      | S     | V     |       |       | del   | I     | S    | L   | G   | V   | S   |      |
| September 2020 (N=3) | S      | K   | R   |      |      | F    | S     |       | N     | S     |       | I     | S    | L   | G   |     |     |      |

\*3C-like protease (3CLpro), nucleocapsid (N), non-structural protein (nsp), open-reading frame (ORF), papain-like protease (PLpro), RNA-dependent RNA-polymerase RdRp, spike (S)
